# Supplementary material
Source: PubMed Central journal article supplement (PMC4528522)
Supplement: rspb20151041supp1.pdf [file rspb20151041supp1.pdf]

# Mathematical Proofs of Biological Auctions with Multiple Rewards

Johannes G. Reiter<sup>1</sup>, Ayush Kanodia<sup>1</sup>, Raghav Gupta<sup>1</sup>, Martin A. Nowak<sup>2</sup>,  
and Krishnendu Chatterjee<sup>1</sup>

<sup>1</sup> IST Austria (Institute of Science and Technology Austria), Am Campus 1, Klosterneuburg  
3400, Austria

<sup>2</sup> Program for Evolutionary Dynamics, Department of Mathematics, Department of Organismic  
and Evolutionary Biology, Harvard University, 1 Brattle Square, Cambridge 02138, USA

**Proof of Lemma 1.** Recall that we assume an infinite population size and that  $s_1$  is strictly greater than  $s_2$ . We denote by  $x$  the frequency of the  $s_2$  strategists. Hence,  $1 - x$  denotes the frequency of the  $s_1$  strategists. The individuals compete for two rewards with value  $v_1$  and  $v_2$ . Since the participants in each auction are chosen randomly from the population, the probability that  $k$  out of the  $n$  participants in an auction are  $s_1$  strategists is  $\binom{n}{k}x^{n-k}(1-x)^k$ .

Following Chatterjee et al. (2012), we prove the expected payoff of an  $s_1$  strategist as follows. Let  $i$  be the number of individuals with strategy  $s_1$  participating in the same auction apart from the  $s_1$  strategist under consideration. The probability for  $i = 0$  is  $\binom{n-1}{0}x^{n-1}$  in which case the  $s_1$  strategist surely wins reward  $v_1$ . If  $0 < i \leq n - 1$ , the expected reward of the  $s_1$  strategist is  $\frac{v_1+v_2}{i+1}$ . Since the payment of each individual is equivalent to its strategy, the expected payoff of an  $s_1$  strategist is given by

$$\begin{aligned}
p(s_1) &= \sum_{i=1}^{n-1} \binom{n-1}{i} x^{n-1-i} (1-x)^i \frac{v_1+v_2}{i+1} + v_1 x^{n-1} - s_1 \\
&= \sum_{i=0}^{n-1} \binom{n-1}{i} x^{n-1-i} (1-x)^i \frac{v_1+v_2}{i+1} - v_2 x^{n-1} - s_1 \\
&= \frac{v_1+v_2}{n} \sum_{i=0}^{n-1} \frac{n \cdot (n-1)!}{(i+1) \cdot i! \cdot (n-(i+1))!} \cdot x^{n-(i+1)} \cdot (1-x)^i - v_2 x^{n-1} - s_1 \\
&= \frac{v_1+v_2}{n \cdot (1-x)} \sum_{i=0}^{n-1} \binom{n}{i+1} \cdot x^{n-(i+1)} \cdot (1-x)^{i+1} - v_2 x^{n-1} - s_1 \\
&= \frac{v_1+v_2}{n \cdot (1-x)} \underbrace{\sum_{i=1}^n \binom{n}{i} \cdot x^{n-i} \cdot (1-x)^i}_{1-x^n \text{ since } \sum_{k=0}^n \binom{n}{k} x^{n-k} (1-x)^k = 1} - v_2 x^{n-1} - s_1 \\
&= \frac{v_1+v_2}{n \cdot (1-x)} \cdot (1-x^n) - v_2 x^{n-1} - s_1 \tag{S1}
\end{aligned}$$

Next, we calculate the expected payoff of a  $s_2$  strategist. The  $s_2$  strategist wins the first reward  $v_1$  only in the case there are no  $s_1$  strategists chosen for the same auction. In this case the  $s_2$  strategists wins  $v_1$  with probability  $1/n$  or wins  $v_2$  with probability  $(1-1/n)/(n-1)$ . In the case of a single  $s_1$  bidder participating in the auction, the  $s_2$  strategist can only win  $v_2$  with probability  $1/(n-1)$ . Accounting for the probabilities of both cases and the payment of  $s_2$  which is independent of the outcome, we derive the following expected payoff of an  $s_2$

strategist:

$$\begin{aligned}
p(s_2) &= \binom{n}{0} x^{n-1} (1-x)^0 \left[ \frac{v_1}{n} + \left(1 - \frac{1}{n}\right) \frac{v_2}{n-1} \right] + \binom{n}{1} x^{n-2} (1-x) \frac{v_2}{n-1} - s_2 \\
&= x^{n-1} \left[ \frac{v_1 + v_2}{n} \right] + x^{n-2} (1-x) v_2 - s_2 = \frac{x^{n-1} (v_1 + v_2)}{n} + x^{n-2} (1-x) v_2 - s_2 . \quad (\text{S2})
\end{aligned}$$

□

**Proof of Theorem 1.** Using the results of Lemma 1 we can analyze situations in which a strategy  $s$  is beaten by another strategy  $s'$ . We distinguish two situations (i.e.,  $s'$  has a higher expected payoff than  $s$ ):

–  $s' < s$ : Since we want  $p(s')$  to be larger as  $p(s)$ , the following inequality has to hold:

$$\frac{(v_1 + v_2)x^{n-1}}{n} + v_2 x^{n-2} (1-x) - s' > \frac{(v_1 + v_2)(1 - x^n)}{n(1-x)} - v_2 x^{n-1} - s$$

and can be rewritten as:

$$s - s' > \frac{(v_1 + v_2)(1 - x^{n-1})}{n(1-x)} - v_2 x^{n-2} \quad (\text{S3})$$

–  $s' > s$ : Again we want  $p(s')$  to be larger as  $p(s)$  which requires that:

$$\frac{(v_1 + v_2)(1 - x^n)}{n(1-x)} - v_2 x^{n-1} - s' > \frac{(v_1 + v_2)x^{n-1}}{n} + v_2 x^{n-2} (1-x) - s$$

and can be rewritten as:

$$s' - s < \frac{(v_1 + v_2)(1 - x^{n-1})}{n(1-x)} - v_2 x^{n-2} \quad (\text{S4})$$

Next, we assume that the frequency of the invaders with strategy  $s'$  is  $\epsilon \rightarrow 0$  and the frequency of the  $s$  strategists is  $(1 - \epsilon)$ . Similar as in Chatterjee et al. (2012), higher order terms of  $\epsilon$  are ignored. The mutant strategy  $s'$  can invade a strategy  $s$  if  $p(s') > p(s)$ . In the case of  $s' < s$ , we replace  $x$  by  $\epsilon$  and obtain:

$$s - s' > \frac{(v_1 + v_2)(1 - \epsilon^{n-1})}{n(1 - \epsilon)} - v_2 \epsilon^{n-2} \approx \frac{v_1 + v_2}{n} . \quad (\text{S5})$$

In the case of  $s' > s$ , we replace  $x$  by  $1 - \epsilon$  and obtain:

$$s' - s < \frac{(v_1 + v_2)(1 - (1 - \epsilon)^{n-1})}{n\epsilon} - v_2(1 - \epsilon)^{n-2} \approx \frac{(n-1)(v_1 + v_2)}{n} - v_2 = v_1 - \frac{v_1 + v_2}{n}. \quad (\text{S6})$$

Theorem 1 follows from Eq. (S5) and Eq. (S6).  $\square$

**Proof of Theorem 2.** We prove the mixed equilibria for two rewards with  $n = 2$  and  $n = 3$  as follows. For both values of  $n$  we differentiate Equation (3) with respect to  $s$  and set it to zero. In the case of  $n = 2$ , we get

$$\frac{\delta E(s, I)}{\delta s} = (v_1 - v_2) \cdot p(s) - 1 = 0.$$

and hence obtain  $p(s) = \frac{1}{v_1 - v_2}$ . In the case of  $n = 3$ , we get

$$\frac{\delta E(s, I)}{\delta s} = 2p(s) [P(s)(v_1 - 2v_2) + v_2] - 1 = 0,$$

rewriting and integrating w.r.t.  $s$  gives  $(v_1 - 2v_2)P(s)^2 + 2v_2P(s) = s$ . We solve this quadratic equation for  $P(s)$  and obtain the two possible solutions:  $\frac{-v_2 \pm \sqrt{v_2^2 + s(v_1 - 2v_2)}}{v_1 - 2v_2}$ . Since only in the plus case the solution for the probability density function provides positive values for  $0 \leq s \leq v_1$ , we can disregard the minus case. We obtain  $p(s) = \frac{1}{2\sqrt{v_2^2 + s(v_1 - 2v_2)}}$  for  $n = 3$  and hence we have proven that both probability density functions given in Theorem 2 are indeed mixed equilibria. Next we check if the derived probability density functions are also ESS.

We let  $I$  be a mixed strategy and  $J$  be some pure strategy. Similar as in Chatterjee et al. (2012), we denote by  $E(X, (Y^i, Z^j))$  the expected payoff of the strategy  $X$  playing against  $i$  individuals with strategy  $Y$  and  $j$  individuals with strategy  $Z$ , where  $X, Y, Z \in I, J$ , and  $i + j = n - 1$ . A mixed strategy  $I$  is an ESS iff one of the following two conditions holds for all strategies  $J$  different from  $I$  (Maynard Smith and Price, 1973; Maynard Smith, 1974, 1982; Haigh and Cannings, 1989):

1.  $E(I, (I^{n-1}, J^0)) > E(J, (I^{n-1}, J^0))$ ; or
2.  $E(I, (I^{n-1}, J^0)) = E(J, (I^{n-1}, J^0))$  and  $E(I, (I^{n-2}, J^1)) > E(J, (I^{n-2}, J^1))$ .

In the case of  $n = 2$ , we need to calculate the following four payoffs where  $I$  is the mixed equilibrium strategy in Equation (4) and  $J$  is a pure strategy with value  $s$  in  $[0, v_1 - v_2]$ :

- $E(I, (I^{n-1}, J^0)) = E(I, (I^1, J^0))$ : Since both players use the same strategy their expected reward is  $(v_1 + v_2)/2$ . The expected payment of a strategy uniformly distributed in  $[0, v_1 - v_2]$  is  $\int_0^{v_1 - v_2} x \cdot p(x) dx = (v_1 - v_2)/2$  and hence the expected payoff is  $v_2$ .
- $E(J, (I^{n-1}, J^0)) = E(J, (I^1, J^0))$ : The expected payoff of  $J$  against  $I$  is  $(v_1 - v_2) \cdot \int_0^s p(x) dx + v_2 - s = v_2$ .
- $E(I, (I^{n-2}, J^1)) = E(I, (I^0, J^1))$ : The probability of  $I$  to win  $v_1$  is given by  $1 - \int_0^s p(x) dx$ . Therefore, the expected reward is  $(v_1 - v_2)[1 - s/(v_1 - v_2)] + v_2 = v_1 - s$ . The expected payment is  $\int_0^{v_1 - v_2} x \cdot p(x) dx = (v_1 - v_2)/2$  and hence the payoff is  $(v_1 + v_2)/2 - s$ .
- $E(J, (I^{n-2}, J^1)) = E(J, (I^0, J^1))$ : The expected payoff in this case is  $(v_1 + v_2)/2 - s$ .

We observe that the first ESS condition is not satisfied because  $E(I, (I^1, J^0)) = E(J, (I^1, J^0)) = v_2$ . Since the second ESS condition does also not hold because  $E(I, (I^0, J^1)) = E(J, (I^0, J^1)) = (v_1 + v_2)/2 - s$ , the mixed equilibrium given in Equation (4) is not an ESS.

In the case of  $n = 3$ , we calculate the following expected payoffs to prove that Equation (5) is an ESS. Suppose strategy  $I$  is given by Equation (5) and  $J$  is any other pure strategy with value  $s \geq 0$ :

- $E(I, (I^{n-1}, J^0)) = E(I, (I^2, J^0))$ : Since all three participants in the auction use the same strategy, their expected payoff has to be identical. Their expected reward is  $\frac{v_1 + v_2}{3}$  and their expected payment is given by  $\int_0^{v_1} x p(x) dx$ . Evaluating both terms gives that:

$$E(I, (I^2, J^0)) = \frac{v_1 + v_2}{3} - \frac{\sqrt{v_1^2 - 2v_1v_2 + v_2^2} \cdot (v_1^2 - 2v_1v_2 - 2v_2^2) + 2v_2^3}{3(v_1 - 2v_2)^2} = 0 .$$

- $E(J, (I^{n-1}, J^0)) = E(J, (I^2, J^0))$ : The  $J$ -strategist wins reward  $v_1$  iff both  $I$ -strategists bid less than  $s$ , which happens with probability  $(\int_0^s p(x) dx)^2$ . The  $J$ -strategist wins reward  $v_2$  iff one of the two  $I$ -strategists bids more than  $s$ . The probability of this happening is  $2(\int_0^s p(x) dx)(1 - \int_0^s p(x) dx)$ . Thus, the expected payoff  $E(J, (I^{n-1}, J^0))$  is equal to  $v_1(\int_0^s p(x) dx)^2 + 2v_2(\int_0^s p(x) dx)(1 - \int_0^s p(x) dx) - s$ , which simplifies to  $(v_1 - 2v_2)P(s)^2 + 2v_2P(s) - s$ . However, from the proof of the mixed equilibrium we know that this term evaluates to zero if  $s$  is in the support of  $I$ . We follow that  $E(J, (I^{n-1}, J^0))$  is zero if  $s \leq v_1$  and is negative if  $s > v_1$ .

–  $E(I, (I^{n-2}, J^1)) = E(I, (I^1, J^1))$ : Again we denote by  $P(s) = \int_0^s p(x)dx$ . Hence, the expected payoff is given by

$$E(I, (I^1, J^1)) = \frac{v_1 + v_2}{2}[1 - P(s)]^2 + \frac{2v_1}{2}P(s)[1 - P(s)] + \frac{v_2}{2}P(s)^2 - \int_0^{v_1} x p(x)dx .$$

–  $E(J, (I^{n-2}, J^1)) = E(J, (I^1, J^1))$ : Similarly as above we obtain for the expected payoff:

$$E(J, (I^1, J^1)) = \frac{v_1 + v_2}{2}P(s) + \frac{v_2}{2}[1 - P(s)] - s .$$

Since  $E(I, (I^2, J^0)) = E(J, (I^2, J^0)) = 0$ , the first ESS condition does not hold and we focus on the second condition:  $E(I, (I^1, J^1)) > E(J, (I^1, J^1))$  which evaluates to:

$$\begin{aligned} \frac{v_1 + v_2 - 3s}{6} &> \frac{v_1 \left( \sqrt{v_1 s + v_2^2 - 2v_2 s} - 2s \right) - 2v_2^2 + 4v_2 s}{2(v_1 - 2v_2)} \\ \frac{4v_2^2 + v_1(v_1 + 3s) - v_2(v_1 + 6s) - 3v_1 \sqrt{v_2^2 + v_1 s - 2v_2 s}}{6(v_1 - 2v_2)} &> 0. \end{aligned}$$

To check whether this condition is met, we take the first and second derivative of  $f(s)$  to find the minimum of this function:

$$\begin{aligned} f'(s) &= \frac{3v_1 - 6v_2 - \frac{3v_1(v_1 - 2v_2)}{2\sqrt{v_1 s + v_2^2 - 2v_2 s}}}{6(v_1 - 2v_2)} \\ f''(s) &= \frac{v_1(v_1 - 2v_2)}{8\sqrt{(v_1 s + v_2^2 - 2v_2 s)^3}} . \end{aligned}$$

We observe that  $f''(s)$  is positive iff  $v_2 < v_1/2$  and is negative iff  $v_2 > v_1/2$ . Hence,  $f(s)$  at  $s^*$  is a minimum iff  $v_2 < v_1/2$  and a maximum iff  $v_2 > v_1/2$ . We obtain  $s^* = \frac{v_1 + 2v_2}{4}$  via setting  $f'(s^*) = 0$ . Plugging  $s^*$  into our original function we get that  $f(s^*) = \frac{v_1 - 2v_2}{24}$  which is positive iff  $v_1 > 2v_2$ . Therefore, the mixed equilibrium given in Equation (5) is an ESS iff  $v_1 > 2v_2$  holds which completes the proof of Theorem 2.  $\square$

## References

- Chatterjee, K., J. G. Reiter, and M. A. Nowak (2012). Evolutionary dynamics of biological auctions. *Theoretical Population Biology* 81, 69–80.
- Haigh, J. and C. Cannings (1989). The n-person war of attrition. *Acta Applicandae Mathematicae* 14(1), 59–74.
- Maynard Smith, J. (1974). The theory of games and the evolution of animal conflicts. *Journal of Theoretical Biology* 47(1), 209–221.
- Maynard Smith, J. (1982). *Evolution and the Theory of Games*. Cambridge University Press.
- Maynard Smith, J. and G. R. Price (1973). The Logic of Animal Conflict. *Nature* 246(5427), 15–18.
